# Supplementary material
Source: publisher figshare collection journal article supplement (https://tandf.figshare.com/ndownloader/files/20502570)
Supplement: Supplementary file 1 [file 20502570]

Table1 The details of image information

| Image  Information | Image  Date | Solar Zenith Angle | Cloud Type | Scene  Description |
| --- | --- | --- | --- | --- |
| LC81550382015314LGN00 | 10November 2015 | 51.6840 | Thick/Thin/Broken | Desert |
| LC81860402016086LGN00 | 26 March 2016 | 32.8269 | Broken | Desert |
| LC81420342015159LGN00 | 08 June 2016 | 22.9221 | Thick/Thin/Broken | Soil |
| LC81660552016330LGN00 | 25November 2016 | 35.7610 | Thin/Broken | Soil |
| LC82260742016286LGN01 | 12 October 2016 | 29.4078 | Thin/Broken | Vegetation |
| LC81990272016177LGN00 | 25 June 2016 | 28.3038 | Thick/Broken | Vegetation |
| LC81630702013188LGN00 | 7 July 2013 | 47.0355 | Thick/Broken | Water |
| LC81640722014246LGN00 | 3 September | 38.1141 | Thick/Thin/Broken | Water |

Table2 FCN-8s network parameters

| **Name** | | **Type** | **Filter size/Stride/pad** | | **Num** |
| --- | --- | --- | --- | --- | --- |
| Conv1  Conv2  Conv3  Conv4  Conv5  Fc6  Fc7  Fc8 | Convolution  Convolution  Convolution  Convolution  Convolution  Convolution  Convolution  Convolution | | | 33 / 1 / 100  33 / 1 / 1  33 / 1 / 1  33 / 1 / 1  33 / 1 / 1  77 / 1  11 / 1  11 / 1 | 64  128  256  512  512  4096  4096  n |
